# Supplementary material
Source: PubMed Central journal article supplement (PMC380990)

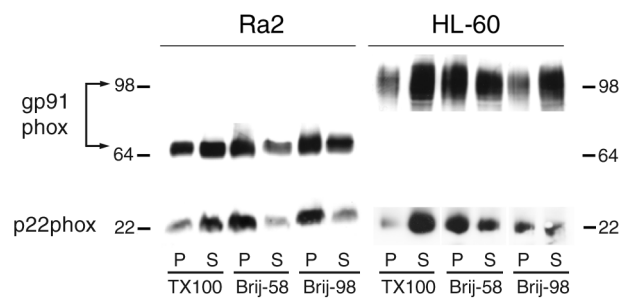

Supplement: 7600066s2.pdf [file 7600066s2.pdf]

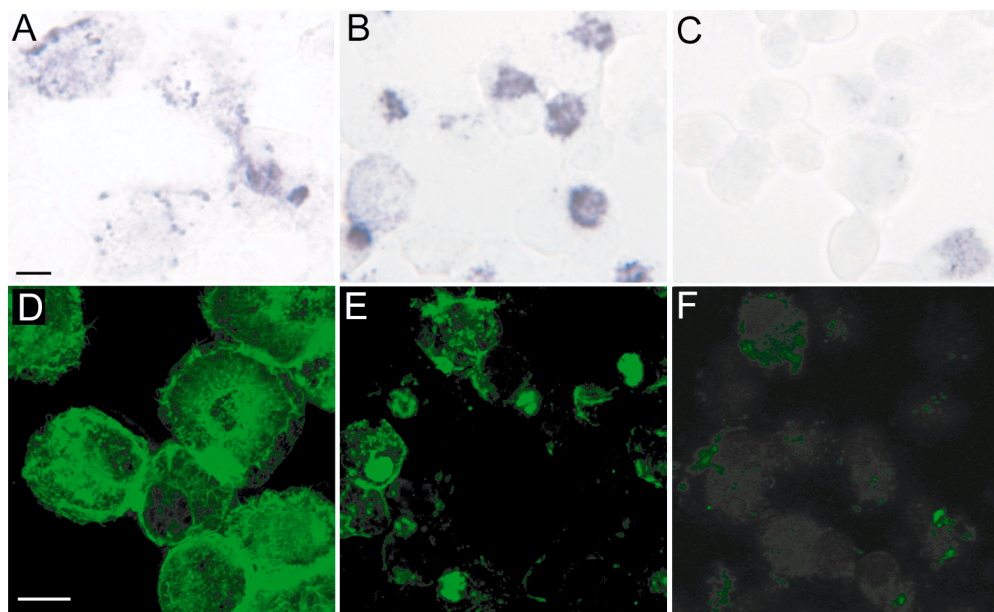

Supplement: 7600066s3.pdf [file 7600066s3.pdf]

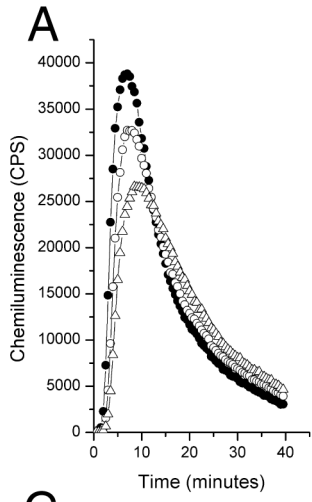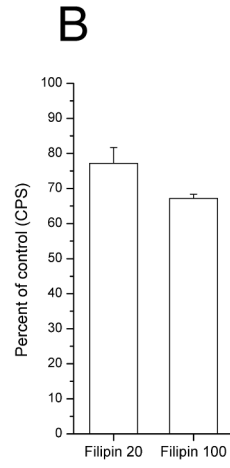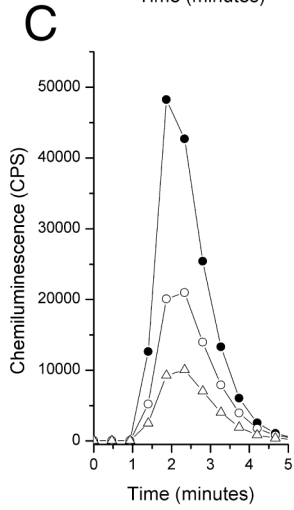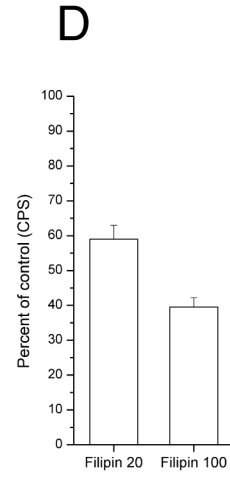

Supplement: 7600066s4.pdf [file 7600066s4.pdf]
